# Supplementary material
Source: Springer Nature journal article supplement (https://www.springermedizin.de/resource/supplementary/13054_2009_7627_MOESM1_ESM.pdf/9730186)
Supplement: MOESM1 [file 9730186]

183 patients screened

58 patients not recruited

- 35 refused consent
- 8 technical reasons
- 5 informed consent not possible
- 3 emergency surgery
- 2 intraoperative MRI necessary
- 2 inclusion at first operation
- 2 preoperative atrial fibrillation
- 1 multimorbid condition

125 patients included in study

24 patients excluded from analysis

- 18 not discharged from ICU on POD 1
- 2 no measurement on POD 1 performed
- 1 no treatment on neurosurgical ICU
- 1 equipment malfunction
- 1 catheter removed by patient
- 1 catheter artificially removed prematurely

101 patients included in final analysis
